# Supplementary material for: Ruthenium/base-catalyzed ortho-selective C–H arylation of acylarenes with halogenated arylboronates
Source: Royal Society of Chemistry journal article supplement (doi:10.1039/c5ra19810k), 2015-01-01

*Supplementary information for*

**Ruthenium/Base-Catalyzed Ortho-Selective C-H Arylation of  
Acyl Arenes with Halogenated Arylboronates**

**Tetsuya Yamamoto<sup>a,b</sup> and Tetsu Yamakawa<sup>a</sup>**

<sup>a</sup> Catalysis Group, Sagami Chemical Research Institute, Hayakawa 2743-1, Ayase, Kanagawa 252-1193, Japan.

<sup>b</sup> Department of green and sustainable chemistry, Tokyo Denki University, Senju-Asahi-cho 5, Adachi-ku, Tokyo 120-8551, Japan.

**Table of Contents**

Copies of <sup>1</sup>H, <sup>13</sup>C and <sup>19</sup>F NMR charts: **3a-d, 3g-i, 4a**.....**S-1-17**

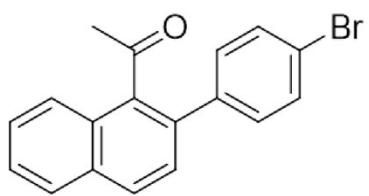

**3a**

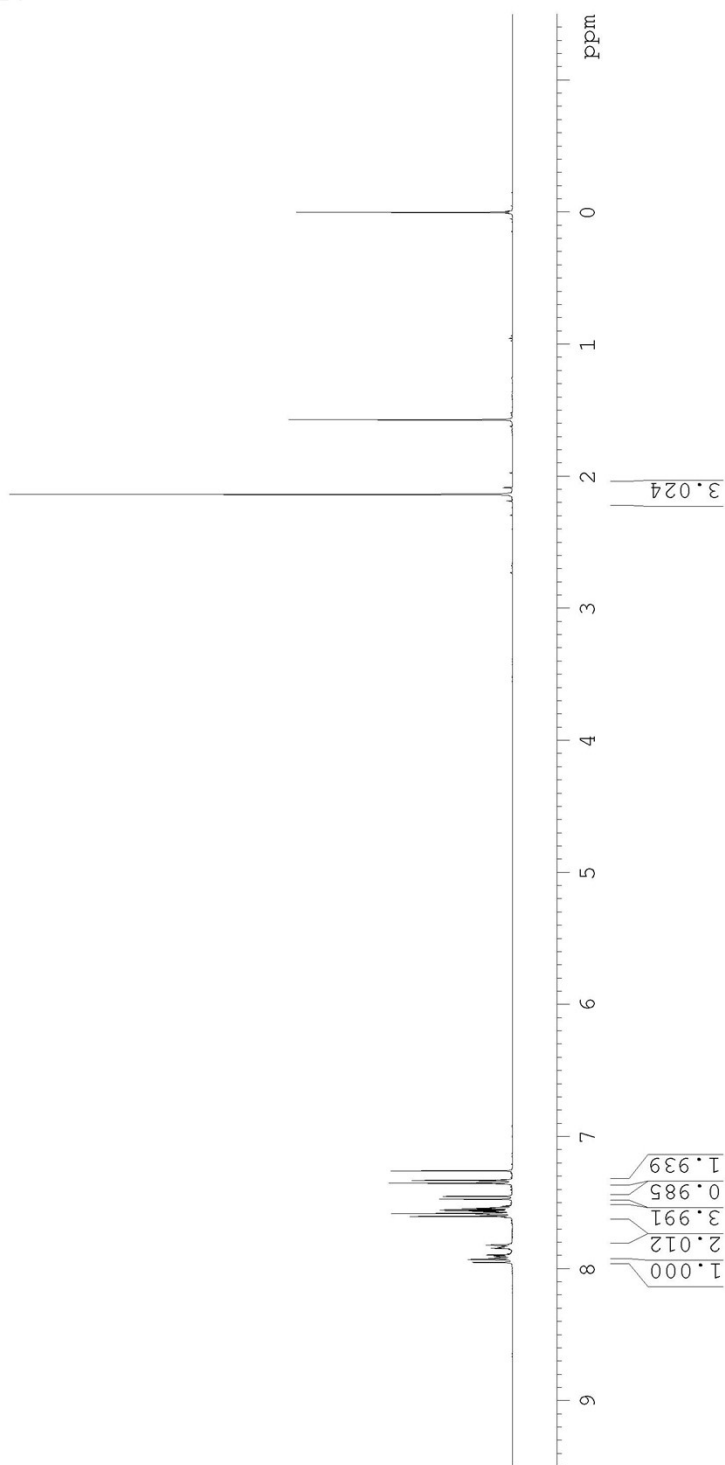

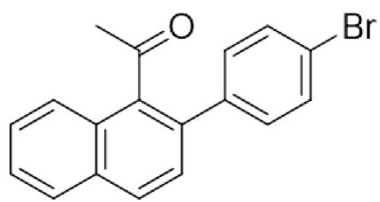

**3a**

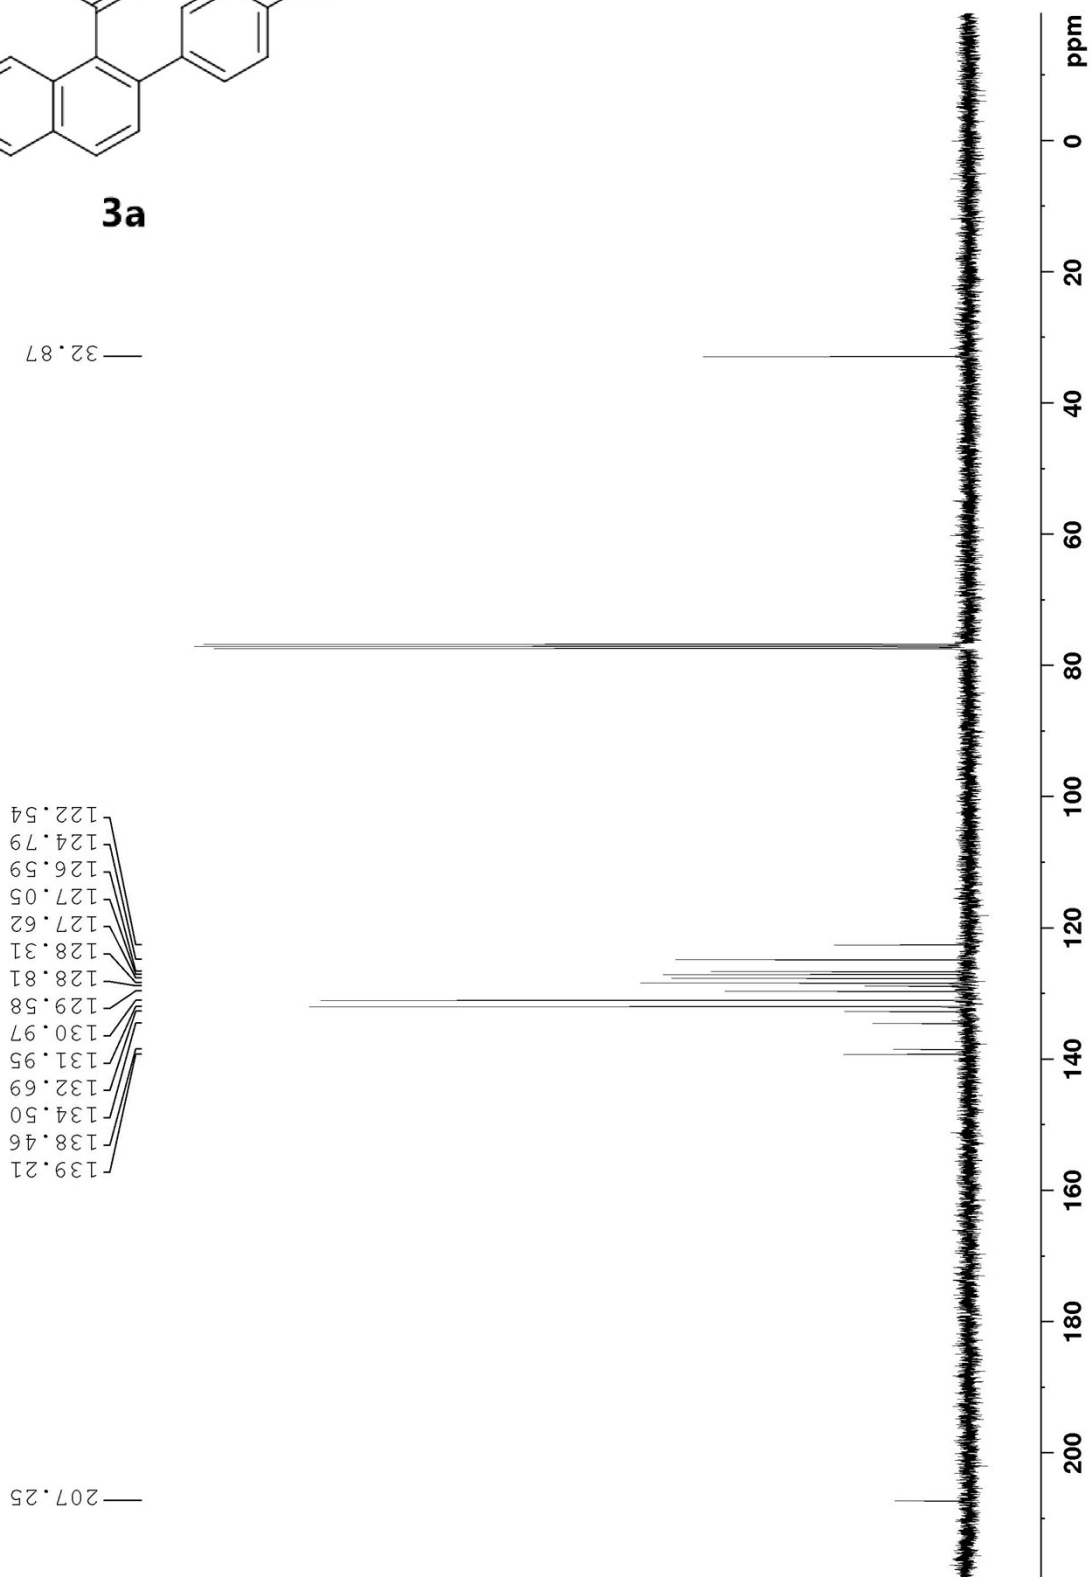

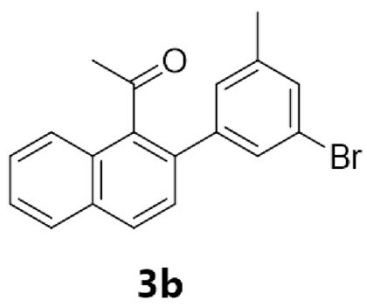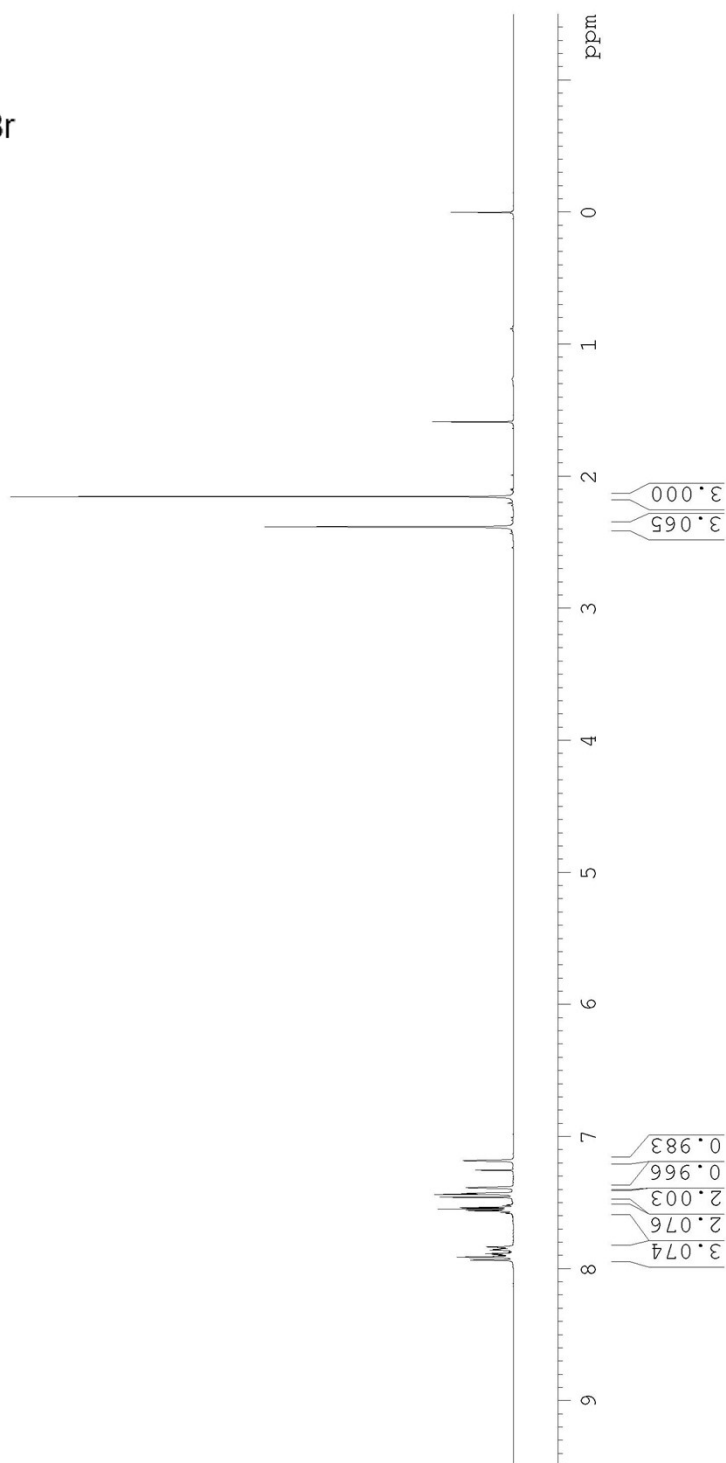

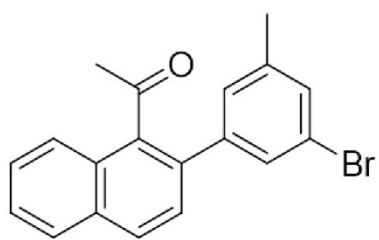

**3b**

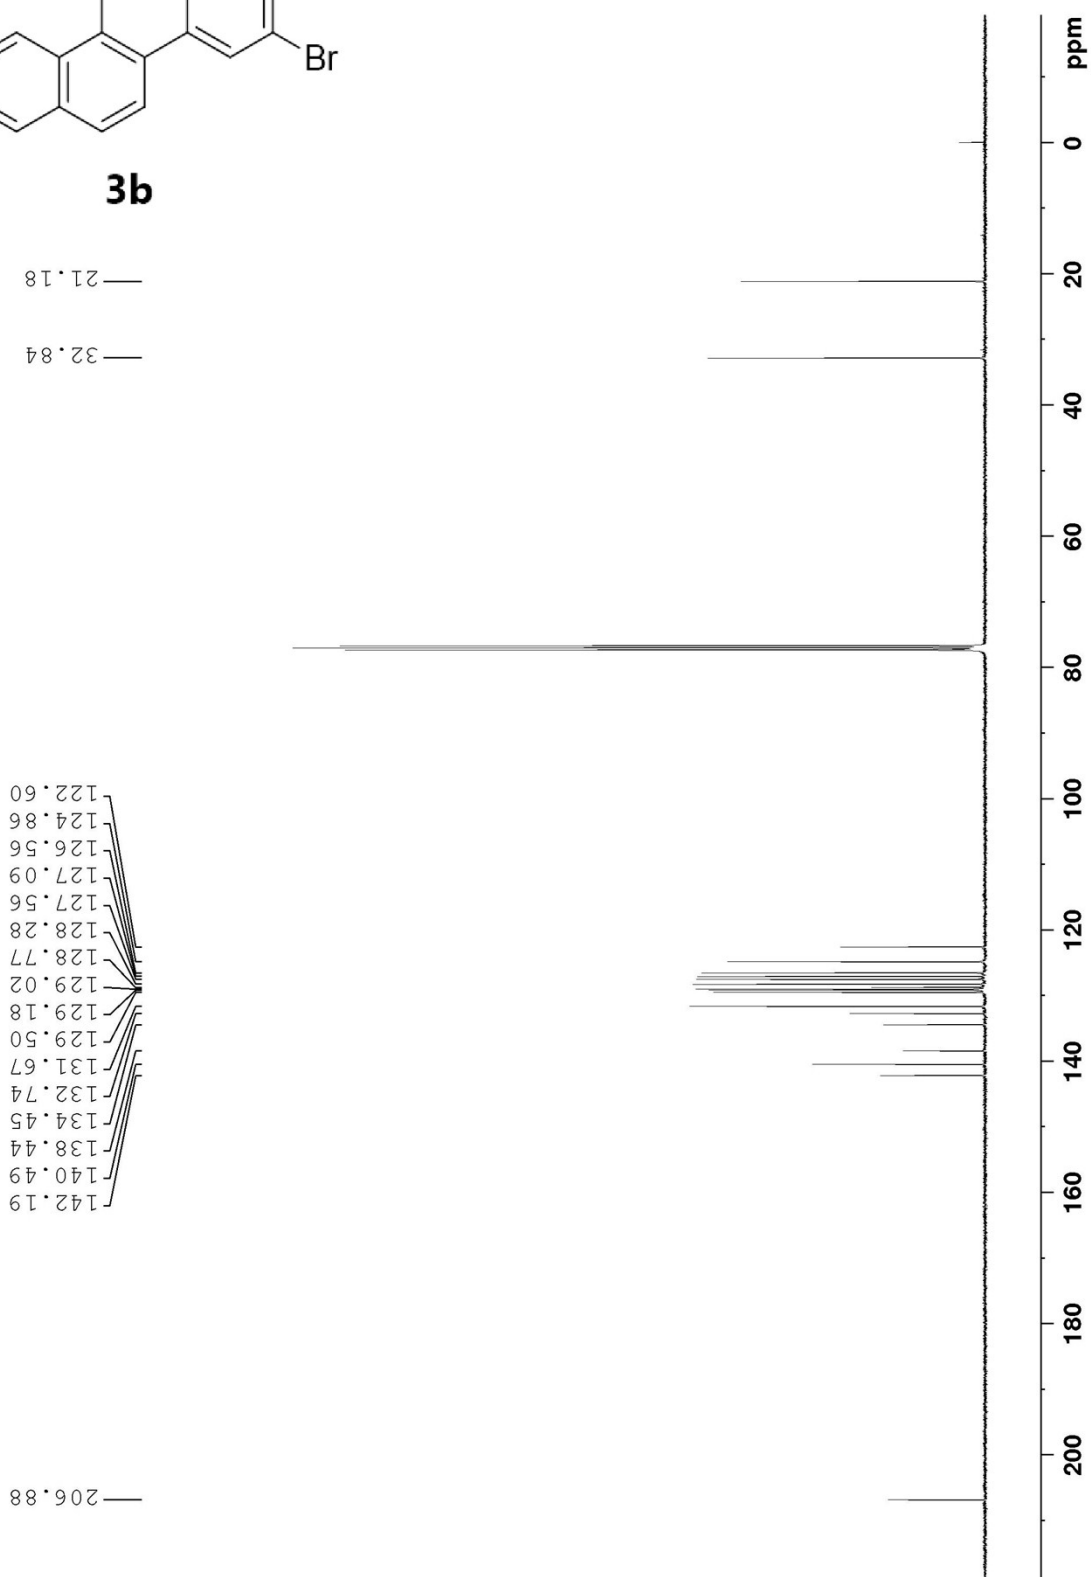

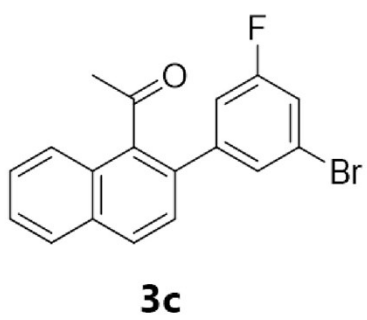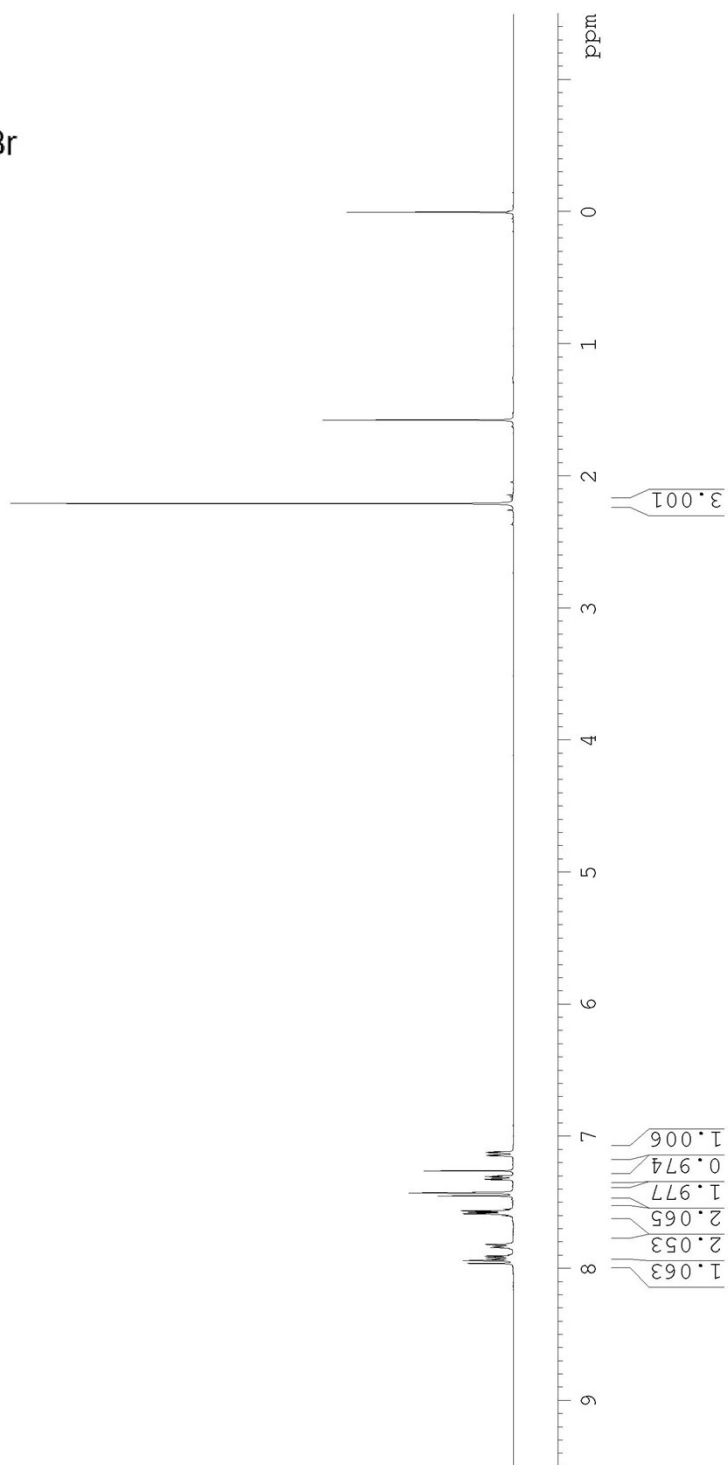

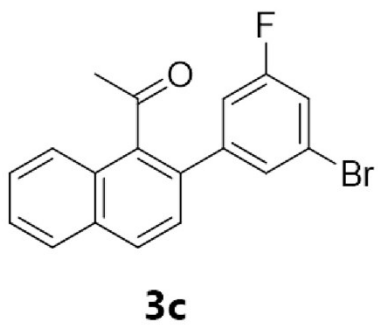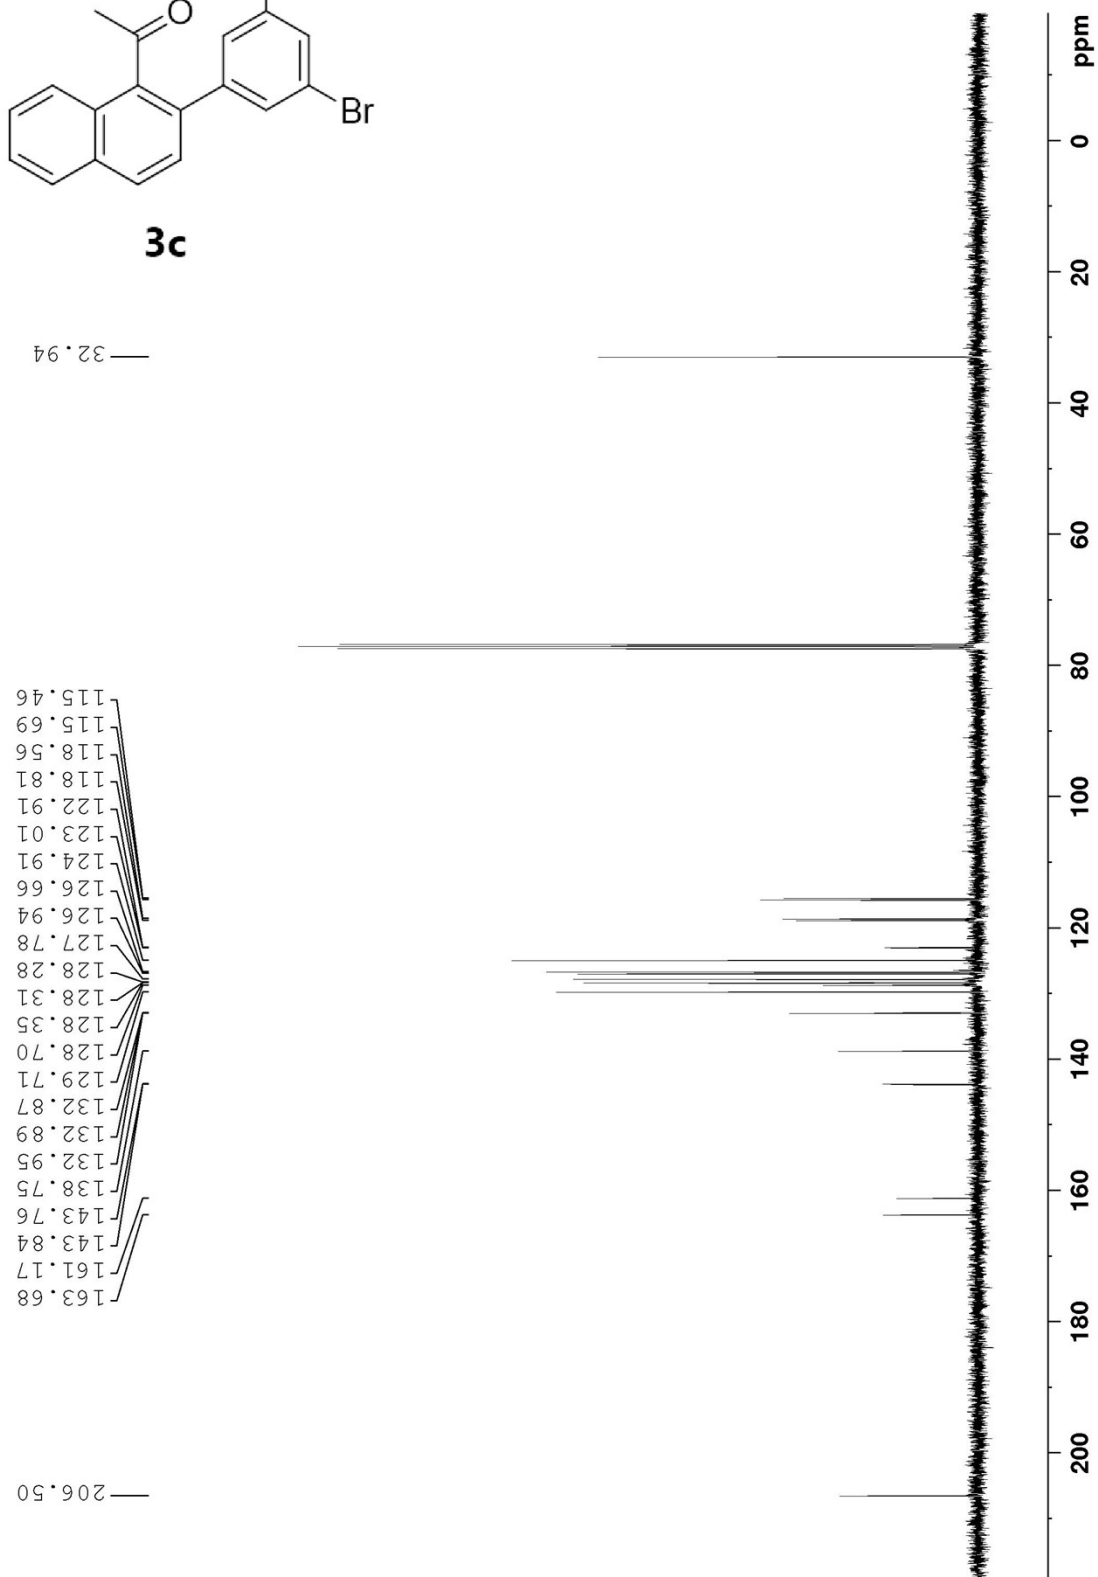

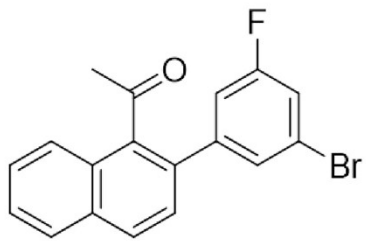

**3c**

— -109.67

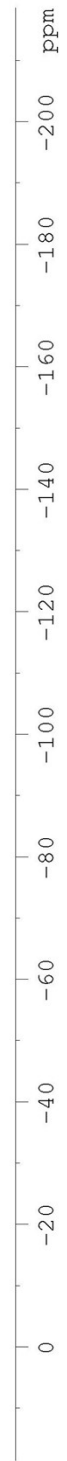



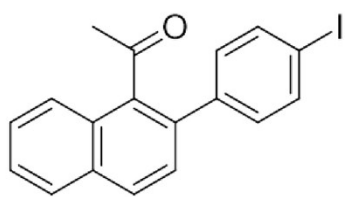

**3d**

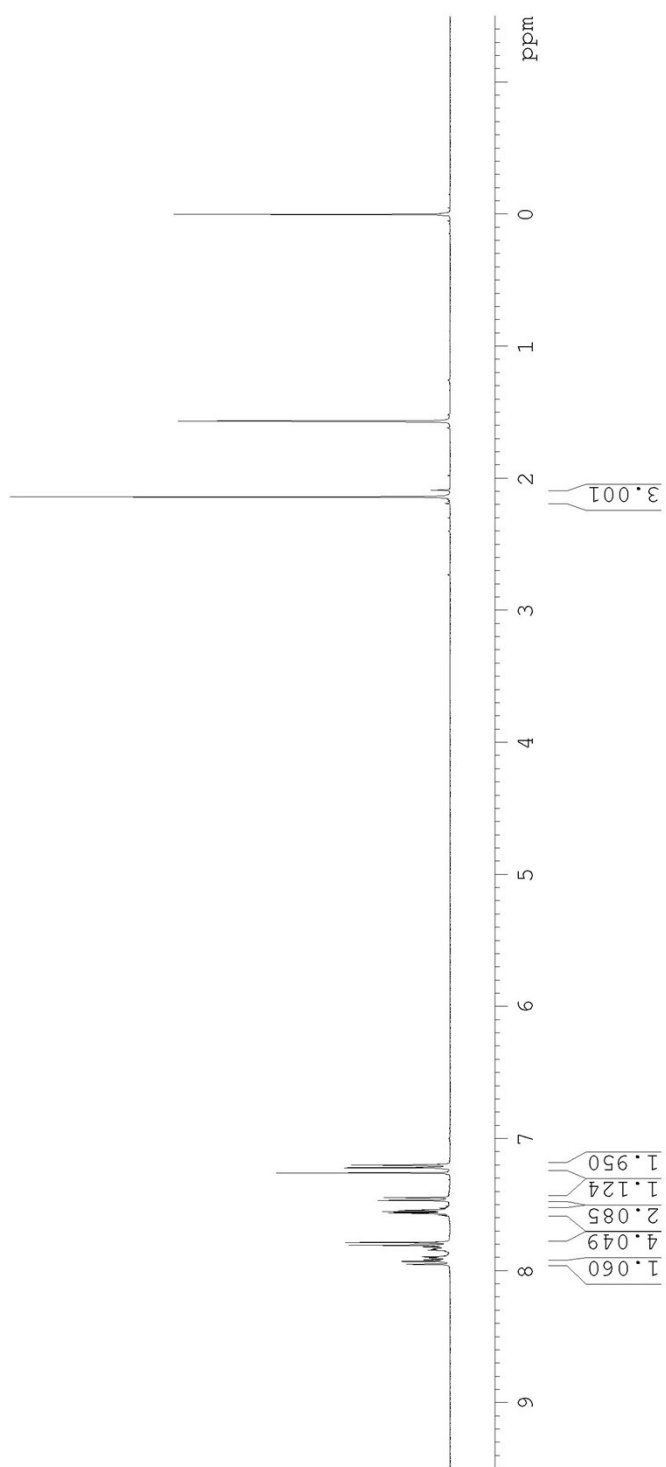

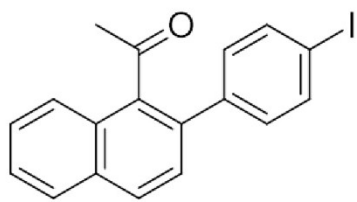

**3d**

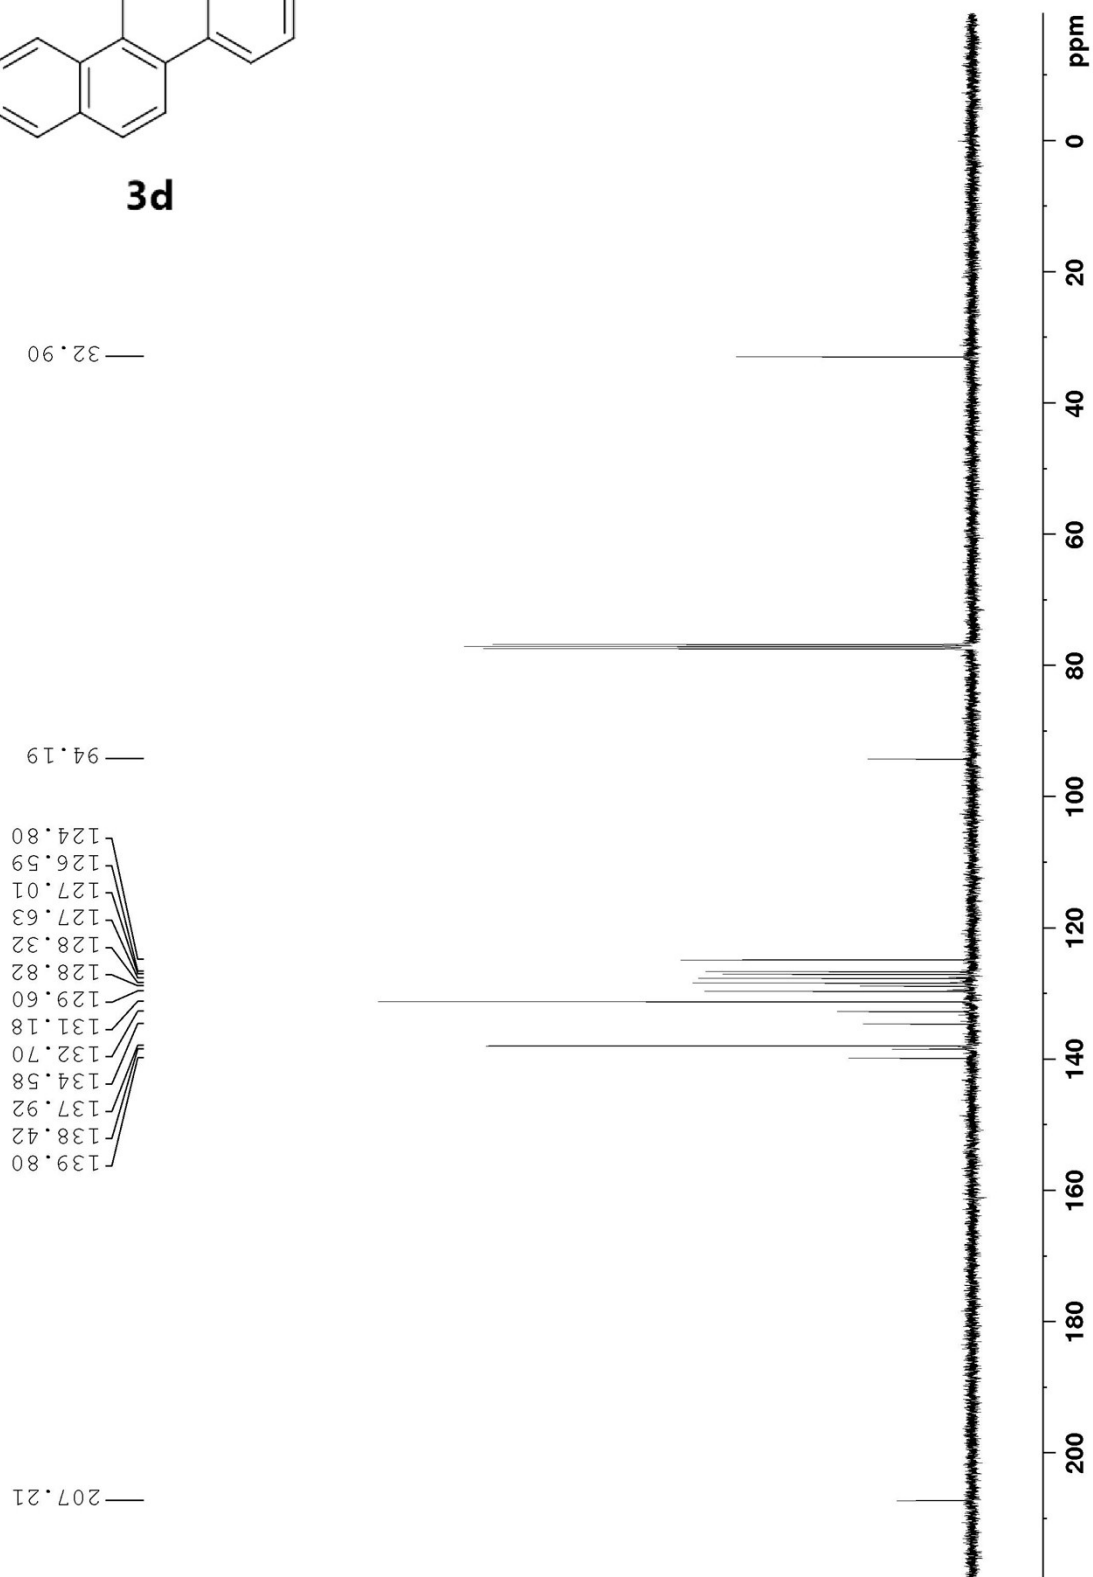

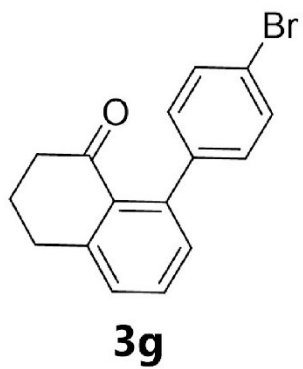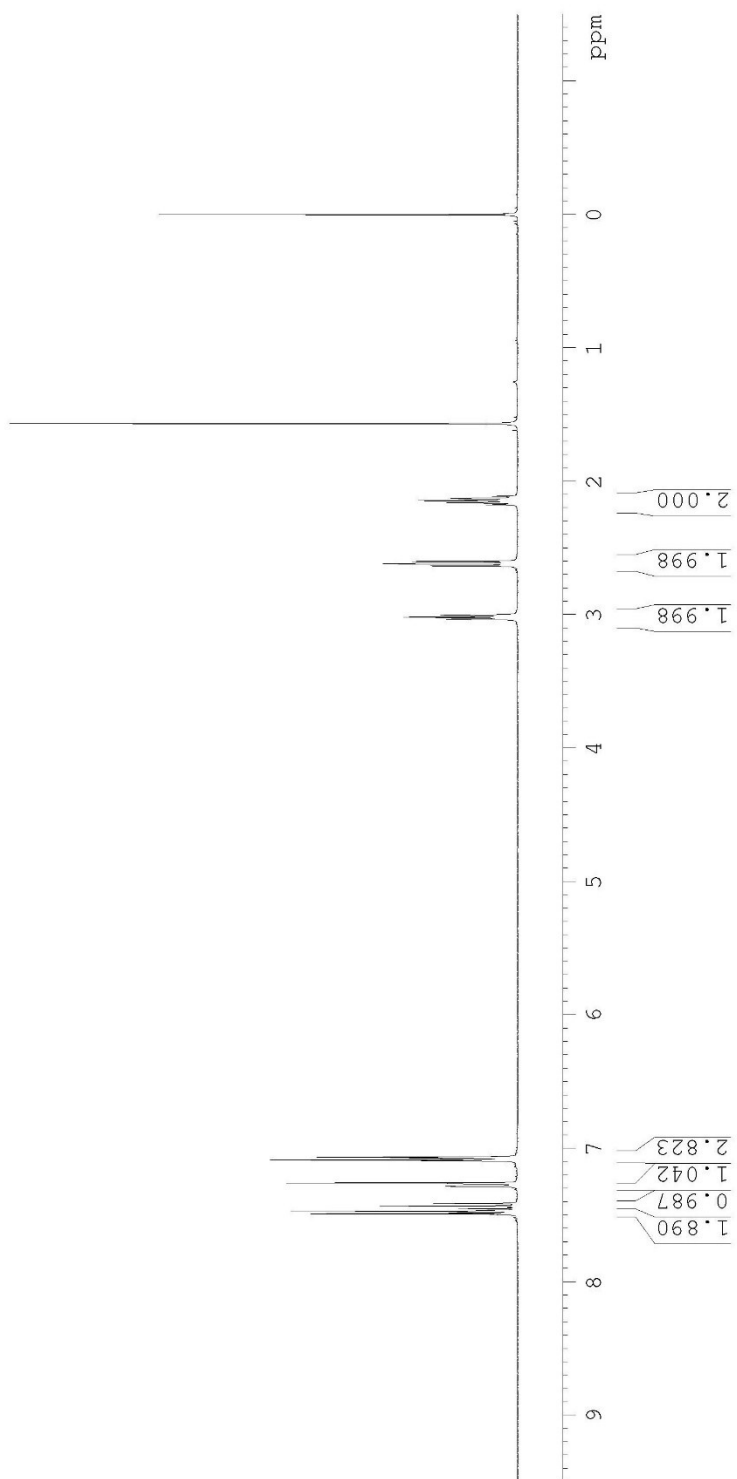

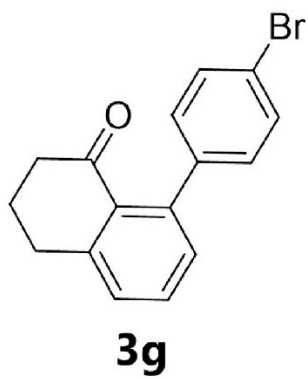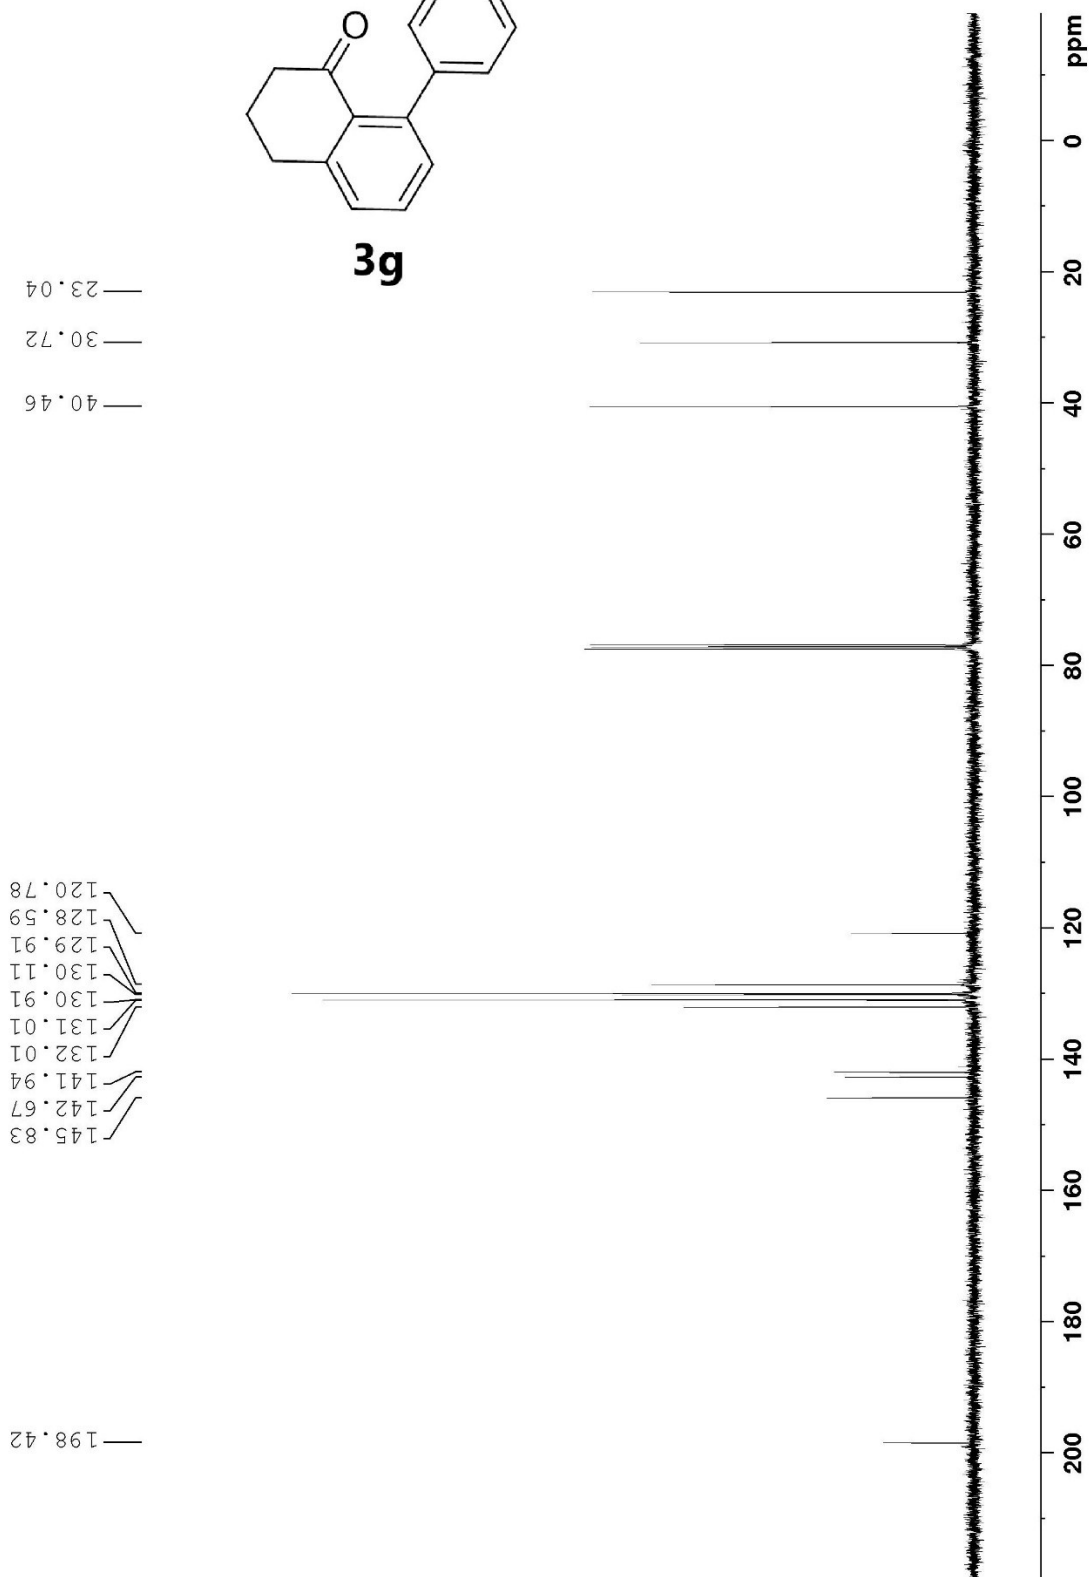

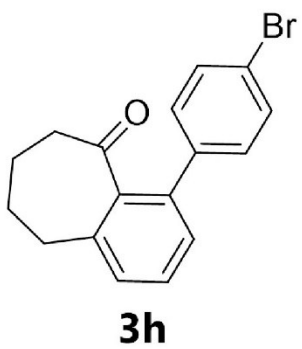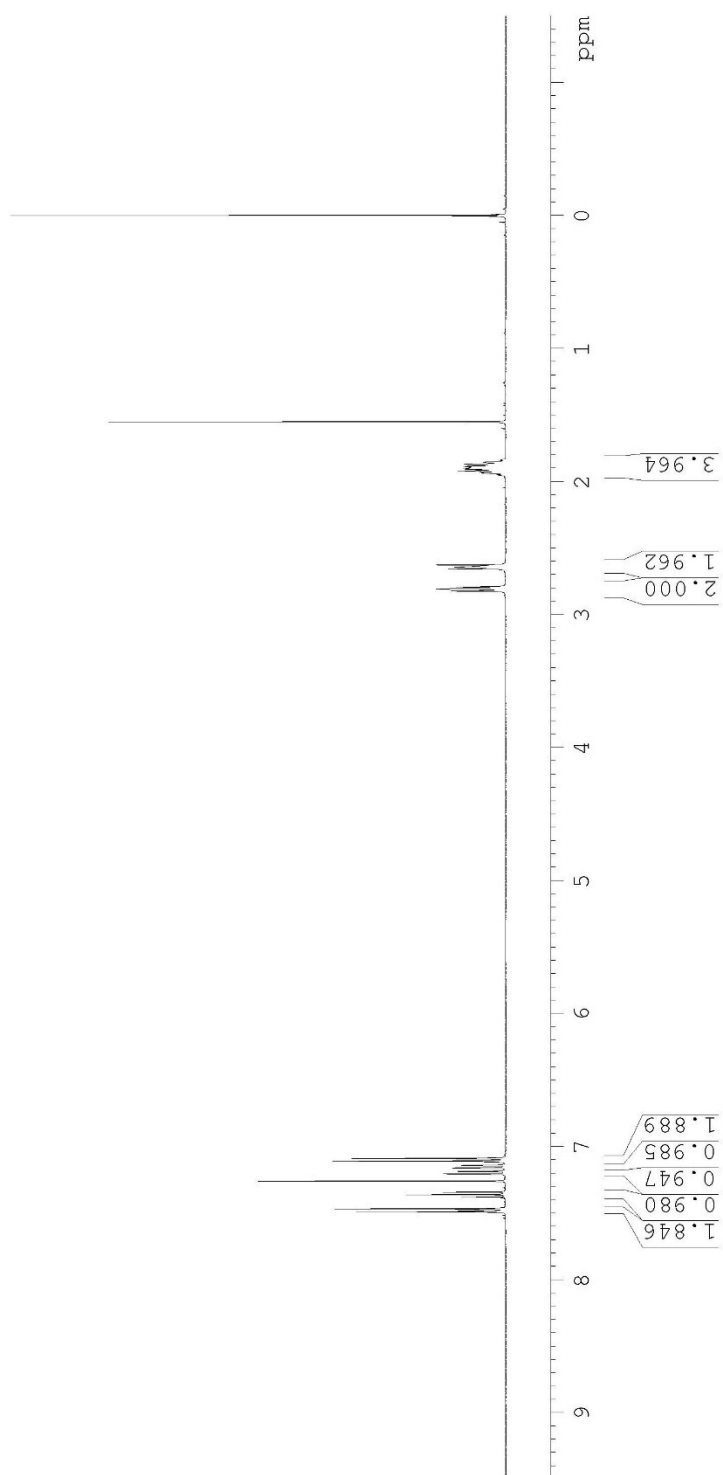

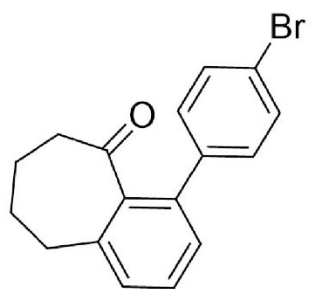

**3h**

— 22.80  
— 25.56  
— 32.53  
— 42.84

121.45  
128.19  
128.66  
130.00  
130.34  
130.34  
131.39  
137.90  
139.03  
139.88  
140.25

— 209.94

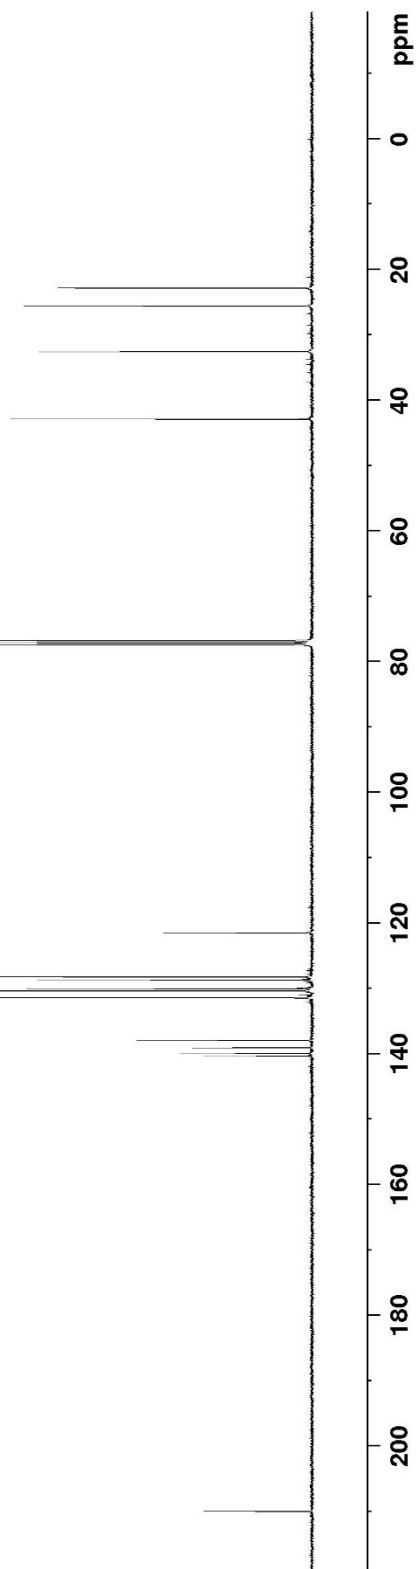



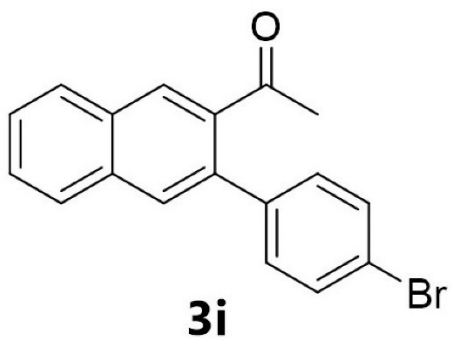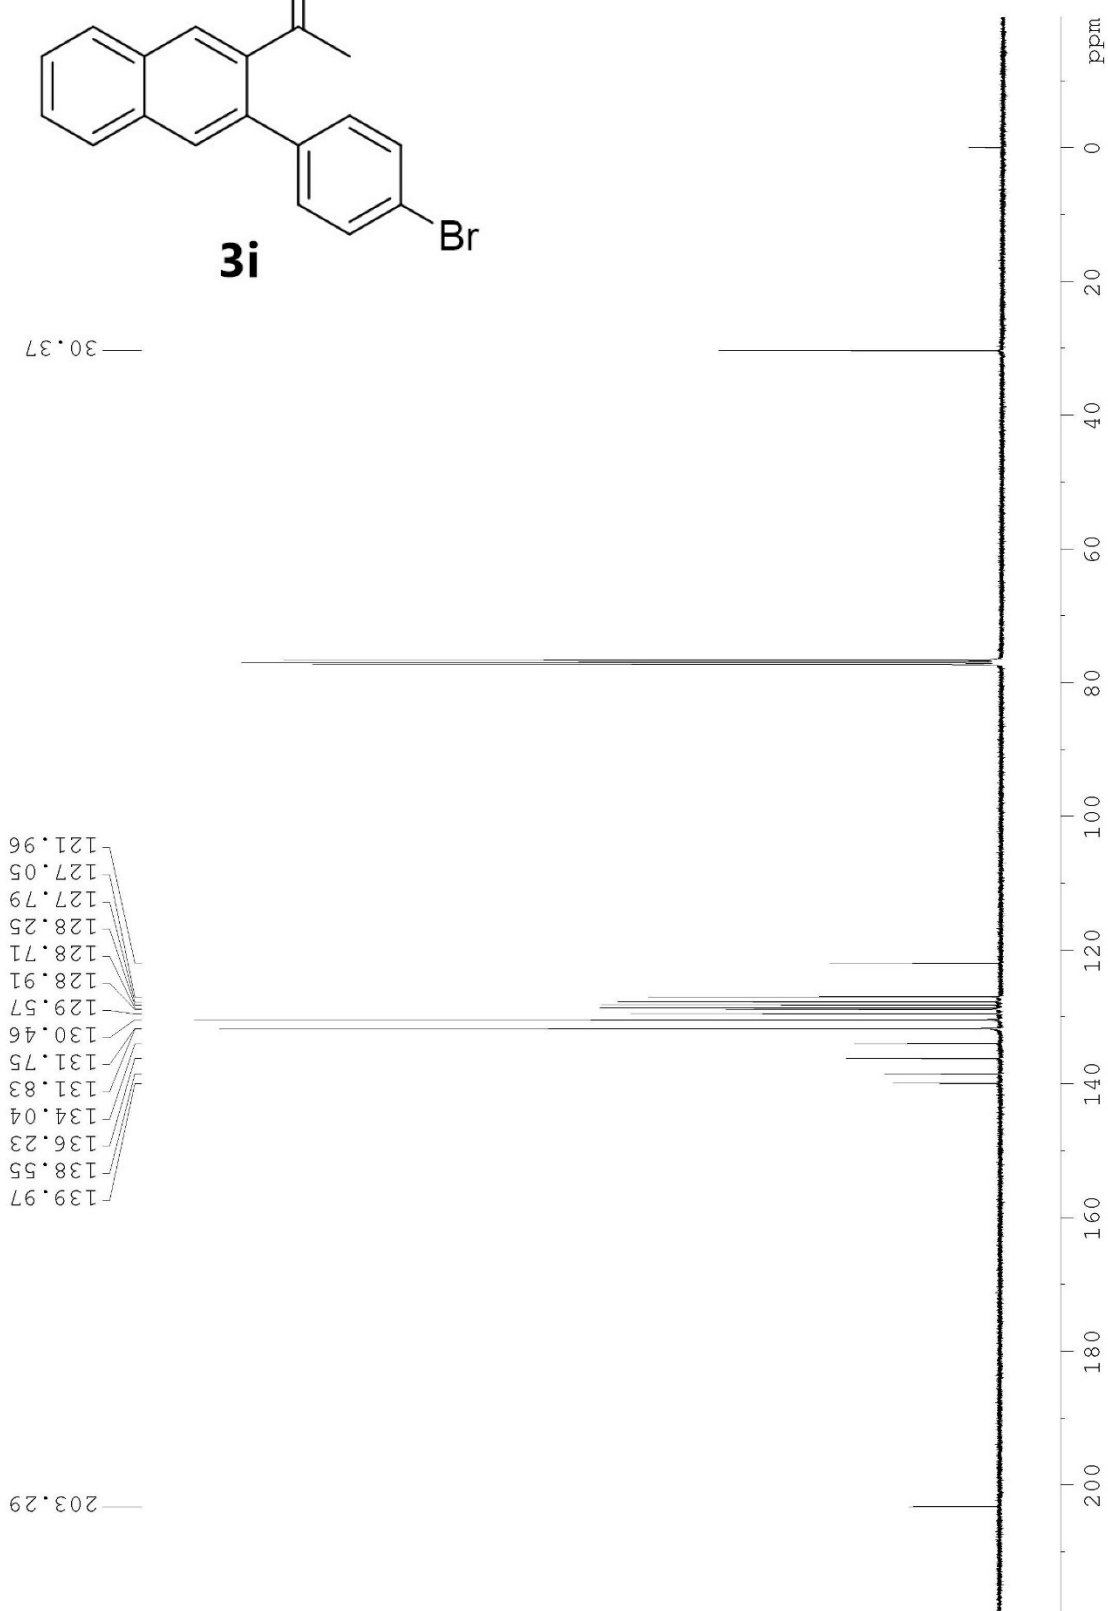



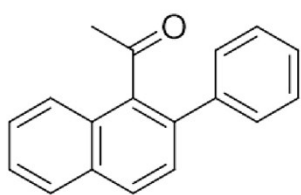

**4a**

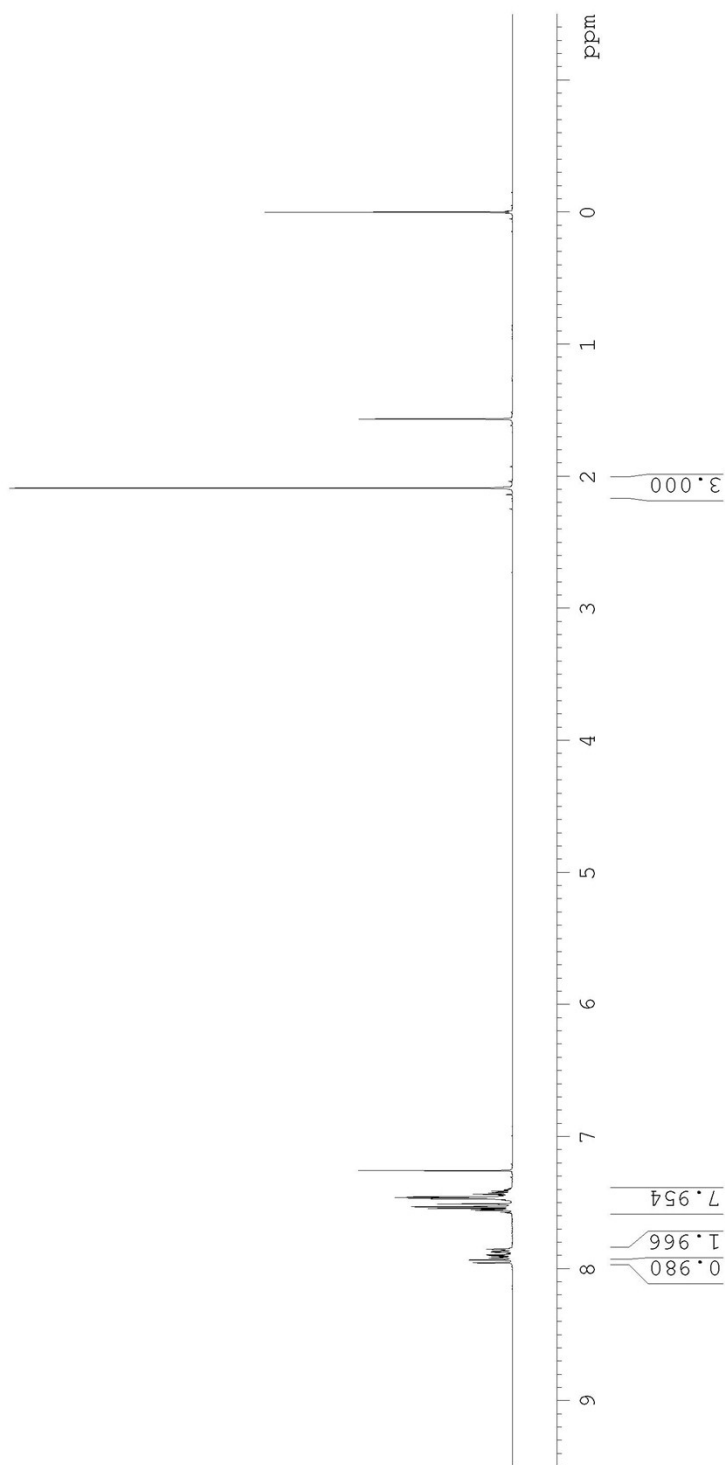

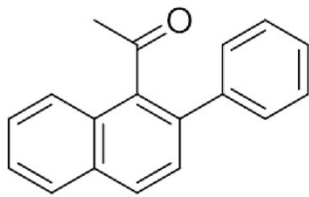

**4a**

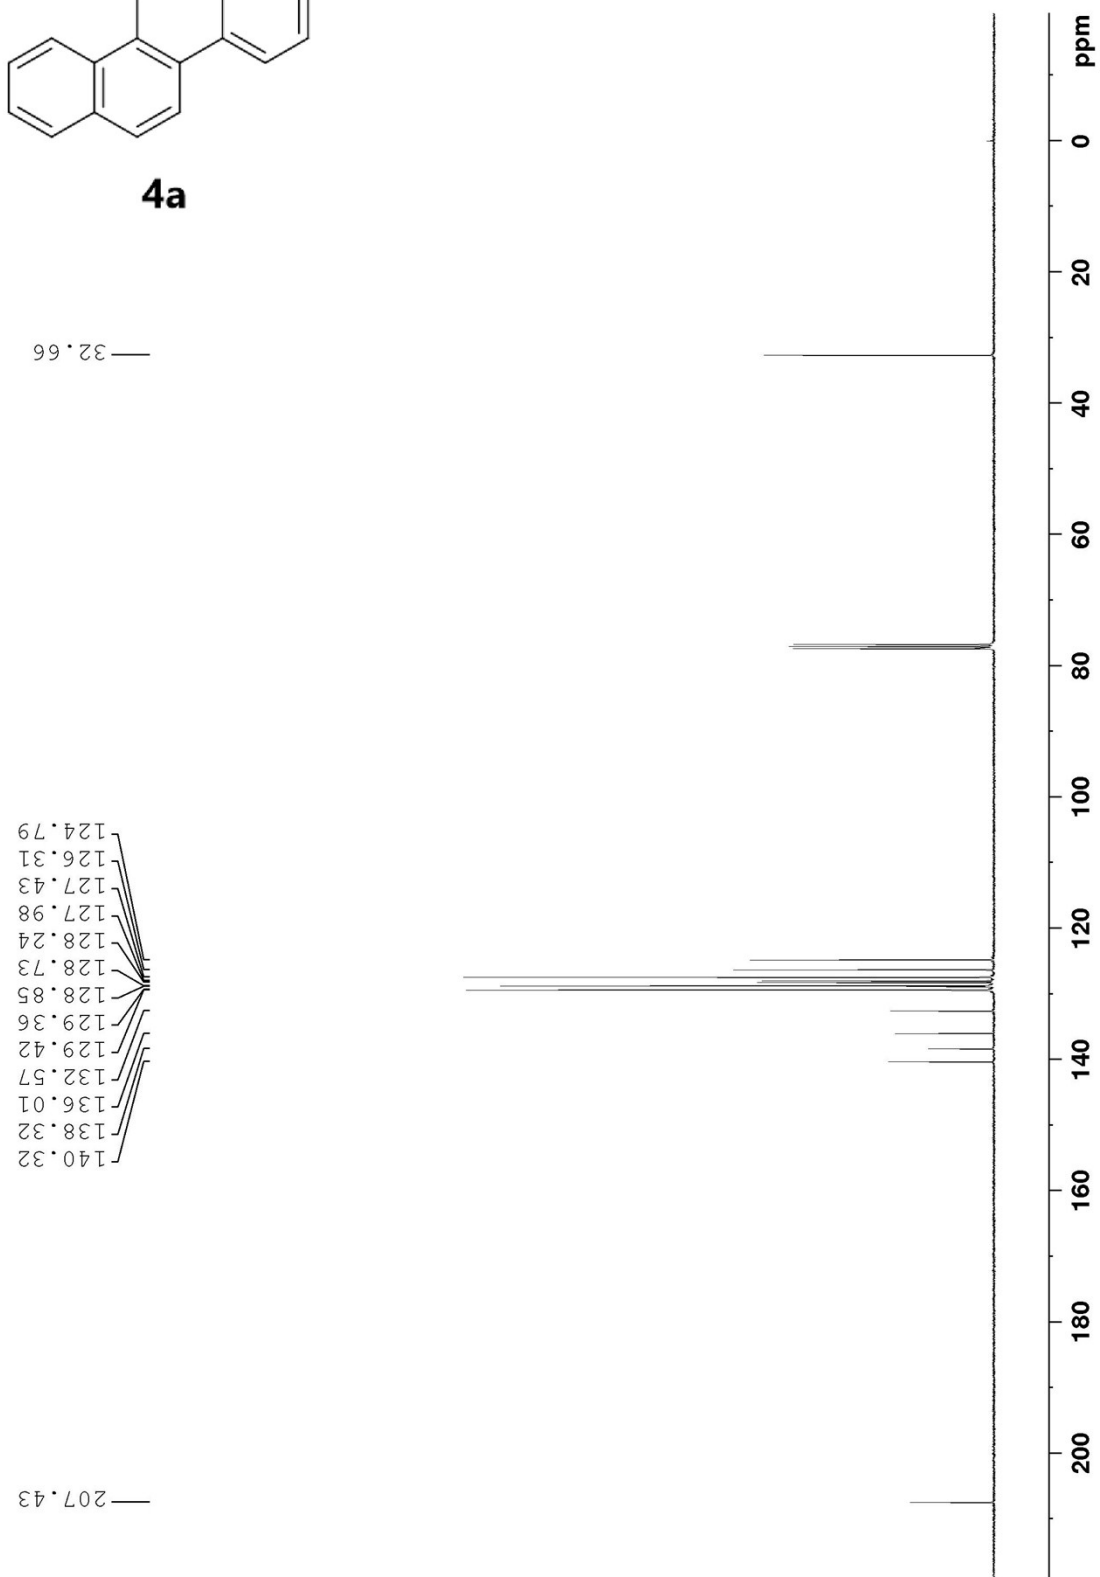

Supplement: c5ra19810k1.pdf [file c5ra19810k1.pdf]
